# Supplementary material for: Unravelling the potency of 4,5-diamino-4H-1,2,4 triazole-3-thiol derivatives for kinase inhibition using a rational approach
Source: Royal Society of Chemistry journal article supplement (doi:10.1039/c8nj04205e), 2018-11-26
Supplement: c8nj04205e1.pdf [file c8nj04205e1.pdf]

# Unravelling the potency of 4,5-diamino-4H- 1,2,4 triazole-3-thiol derivatives for kinase inhibition through a rational approach

## **Supplementary Information**

## **Supplementary Information**

## Table of Contents:

| <b>Category</b>                                      | <b>Page No.</b> |
|------------------------------------------------------|-----------------|
| <b>Mass Spectrometry of the Compound 1-16</b>        | <b>3-6</b>      |
| <b><sup>1</sup>HNMR Spectra of the Compound 1-16</b> | <b>7-14</b>     |
| <b>Kinase Inhibition Assay of DYRK1A</b>             | <b>15</b>       |
| <b>Kinase Inhibition Assay of CLK-1</b>              | <b>15</b>       |

**Mass Spectrometry**

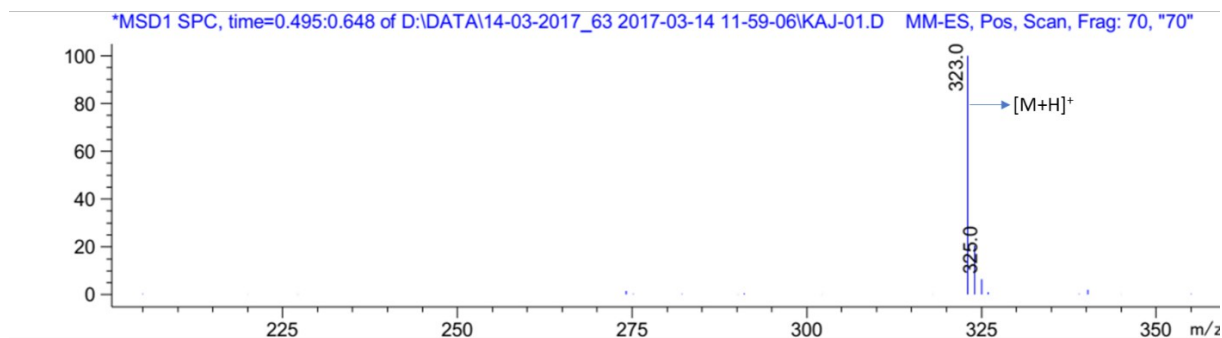

Figure-S1. Mass Spectra of Compound-1

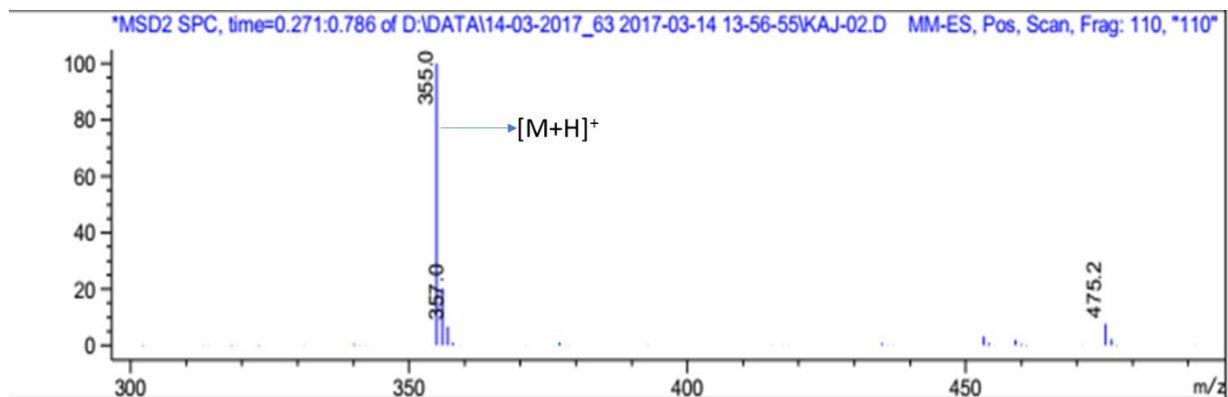

Figure-S2. Mass Spectra of Compound-2

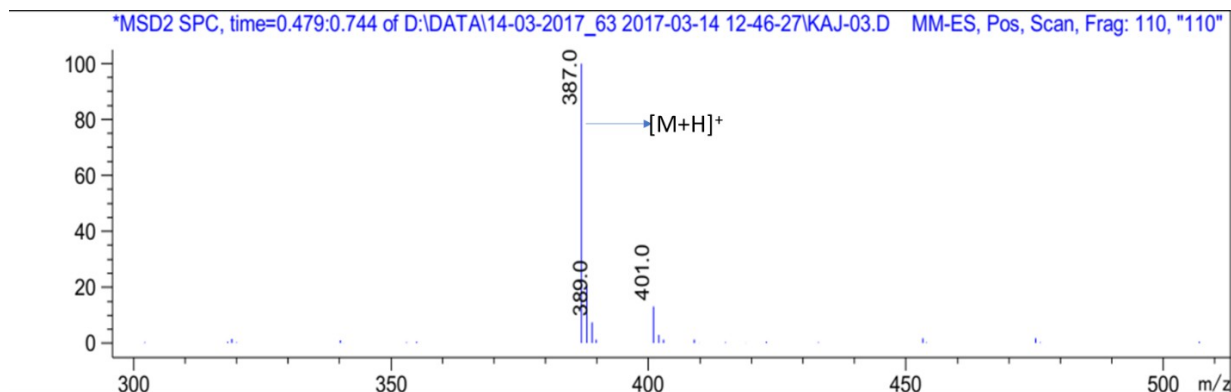

Figure-S3. Mass Spectra of Compound-3

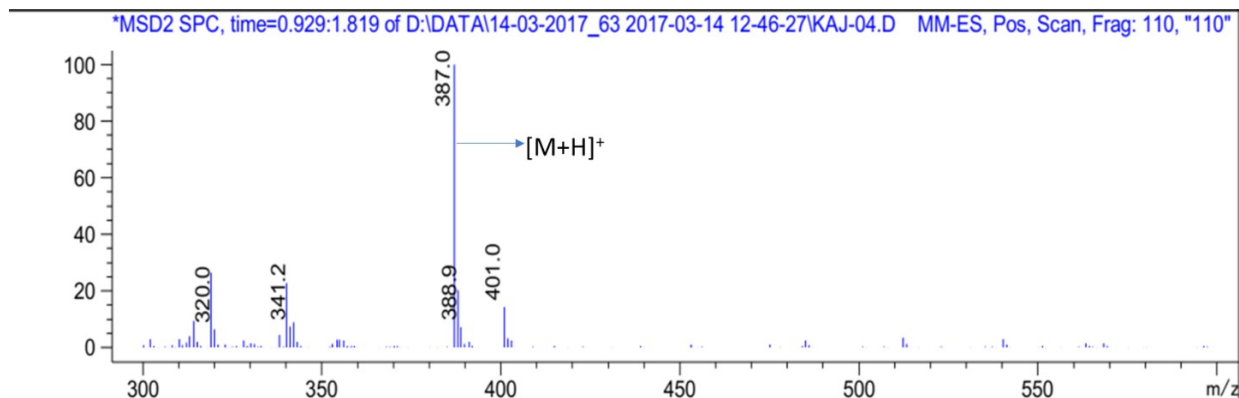

Figure-S4. Mass Spectra of Compound-4

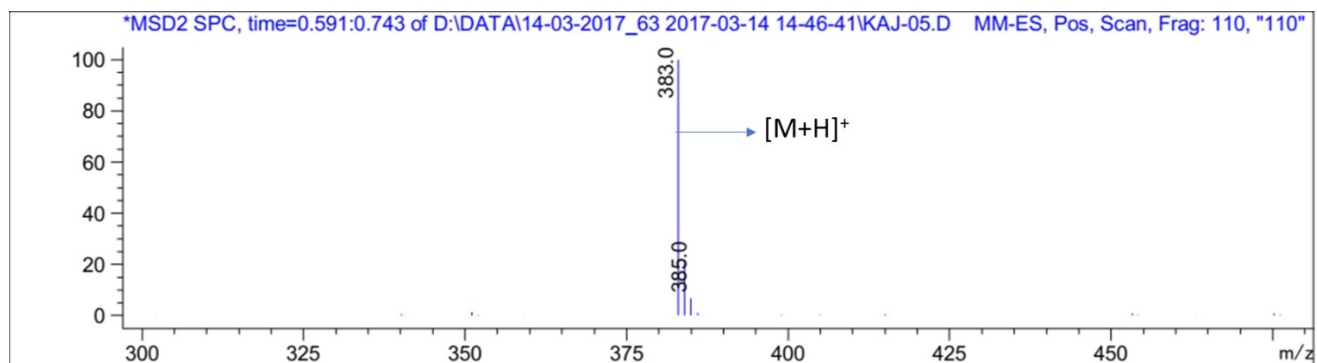

Figure-S5. Mass Spectra of Compound-5

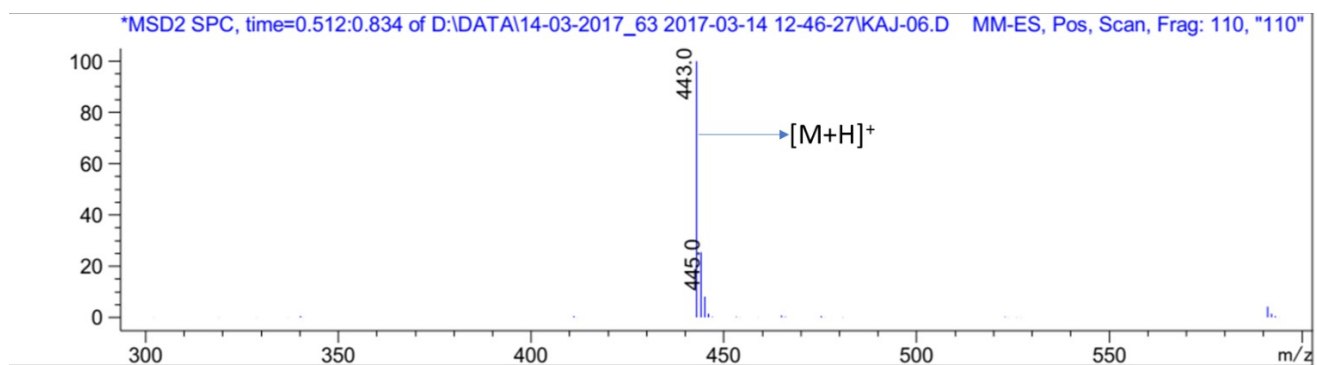

Figure-S6. Mass Spectra of Compound-6

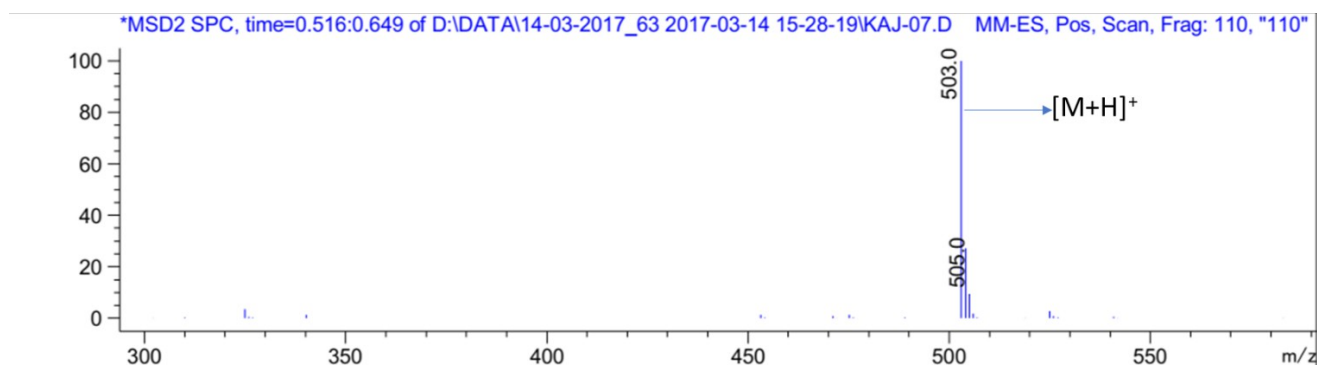

Figure-S7. Mass Spectra of Compound-7

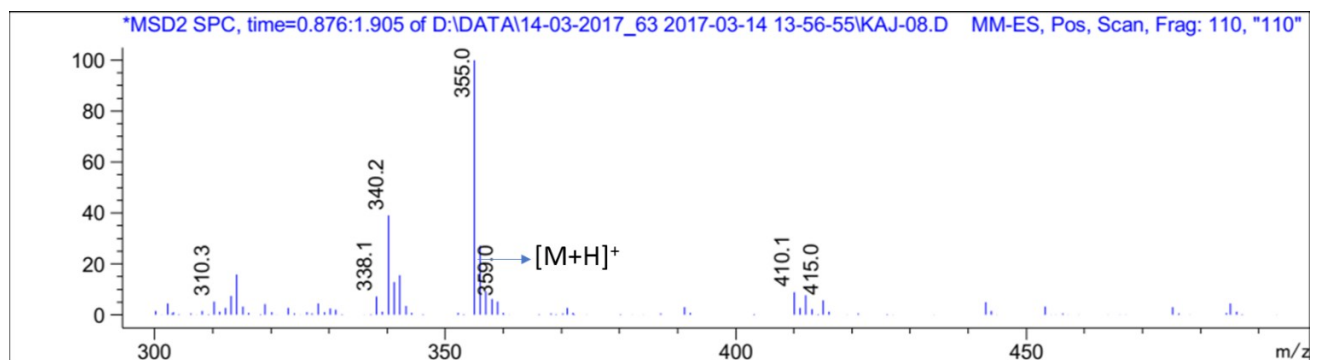

Figure-S8. Mass Spectra of Compound-8

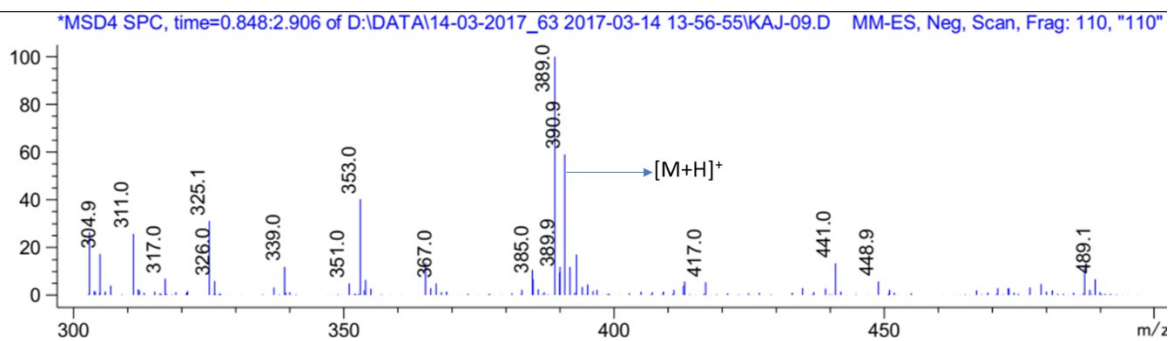

**Figure-S9. Mass Spectra of Compound-9**

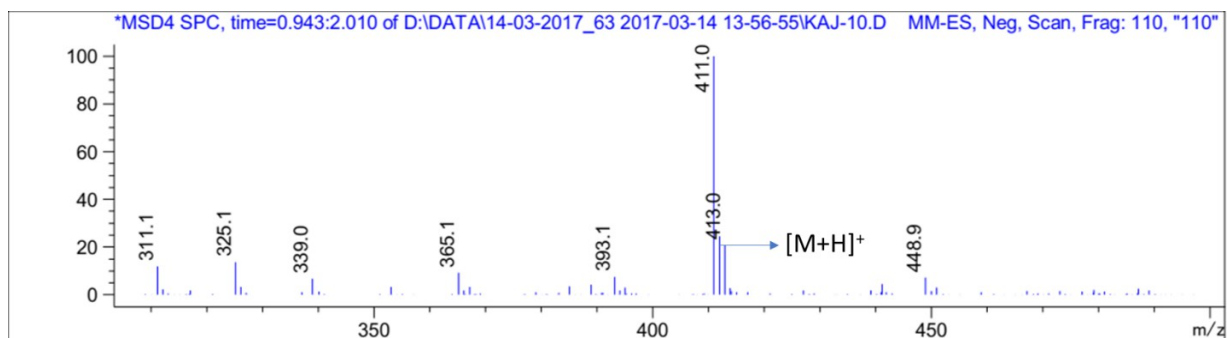

**Figure-S10. Mass Spectra of Compound-10**

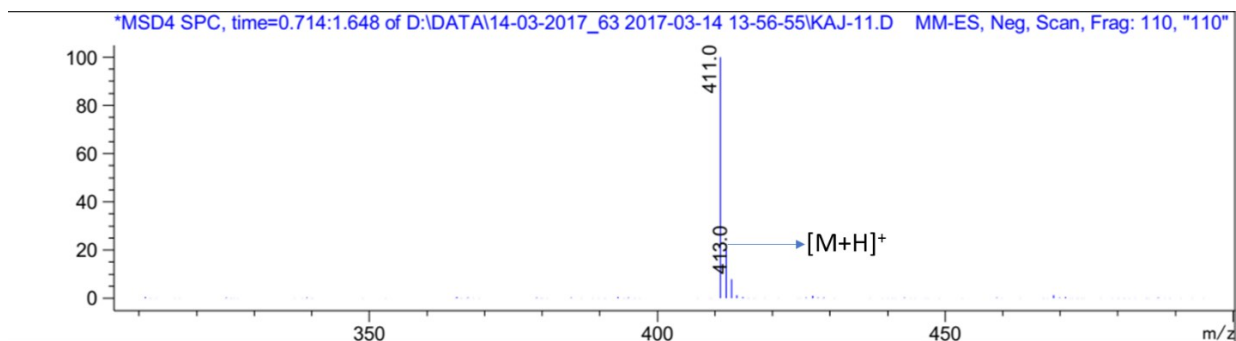

**Figure-S11. Mass Spectra of Compound-11**

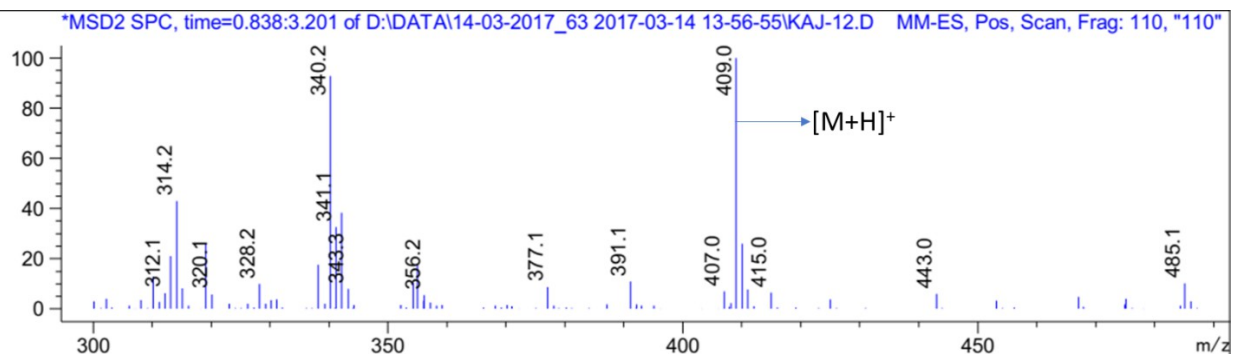

**Figure-S12. Mass Spectra of Compound-12**

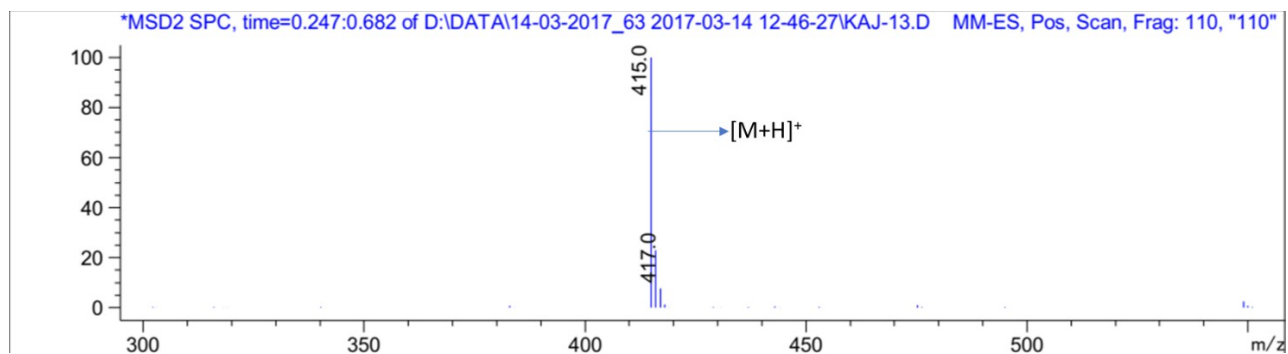

**Figure-S13. Mass Spectra of Compound-13**

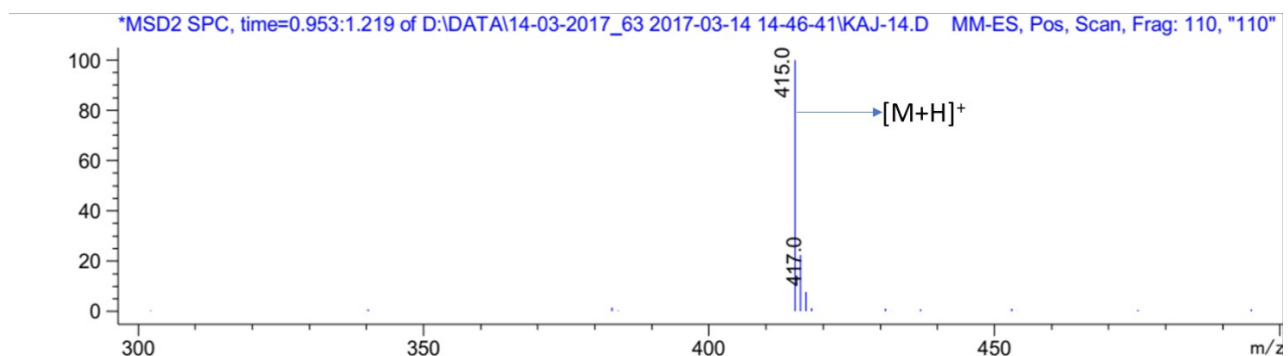

**Figure-S14. Mass Spectra of Compound-14**

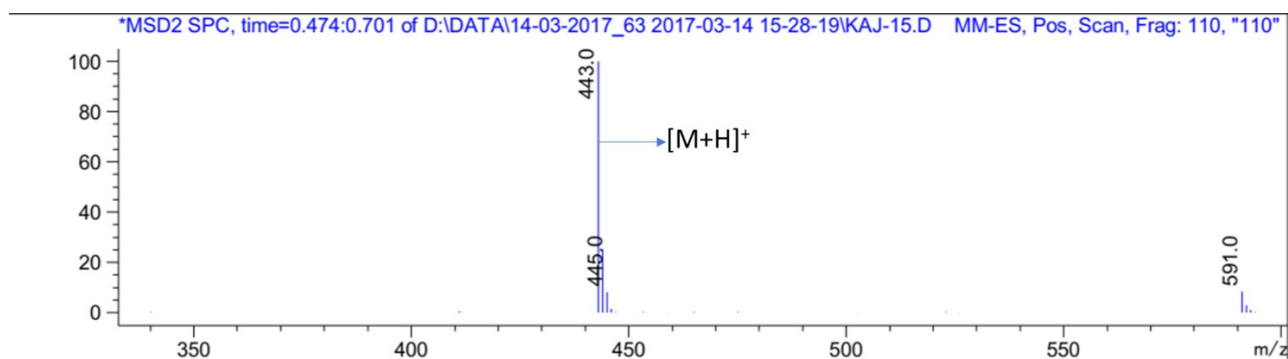

**Figure-S15. Mass Spectra of Compound-15**

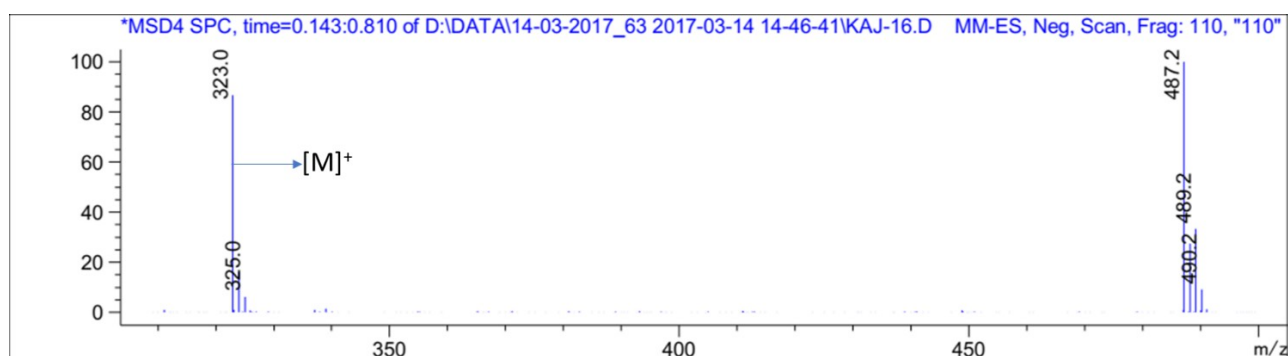

**Figure-S16. Mass Spectra of Compound-16**

## H<sup>1</sup> NMR Spectra

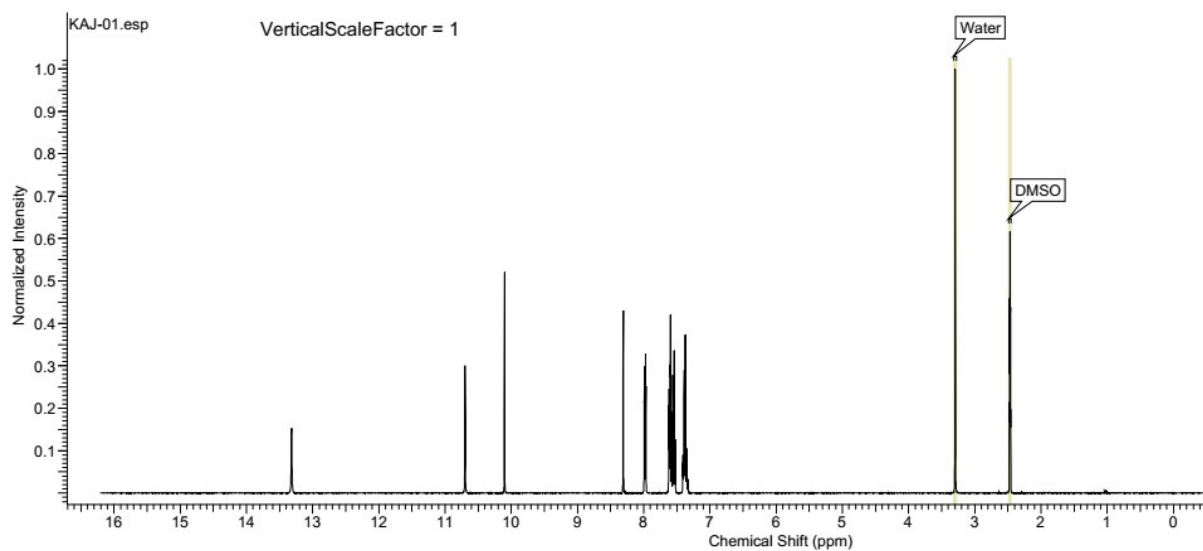

Figure-S17. H<sup>1</sup> NMR Spectra of Compound-1

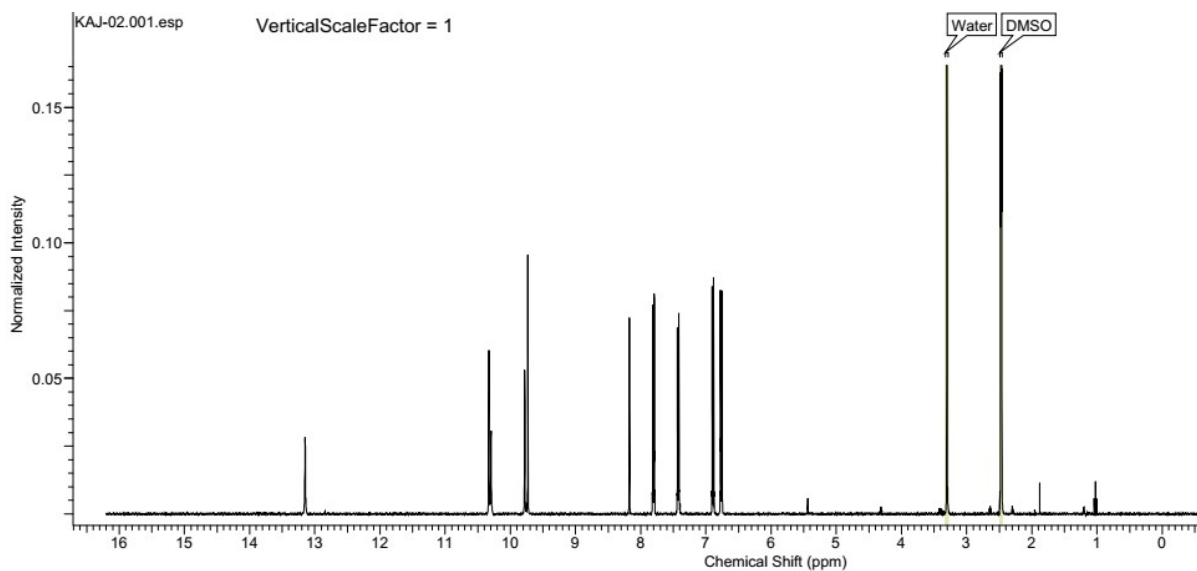

Figure-S18. H<sup>1</sup> NMR Spectra of Compound-2

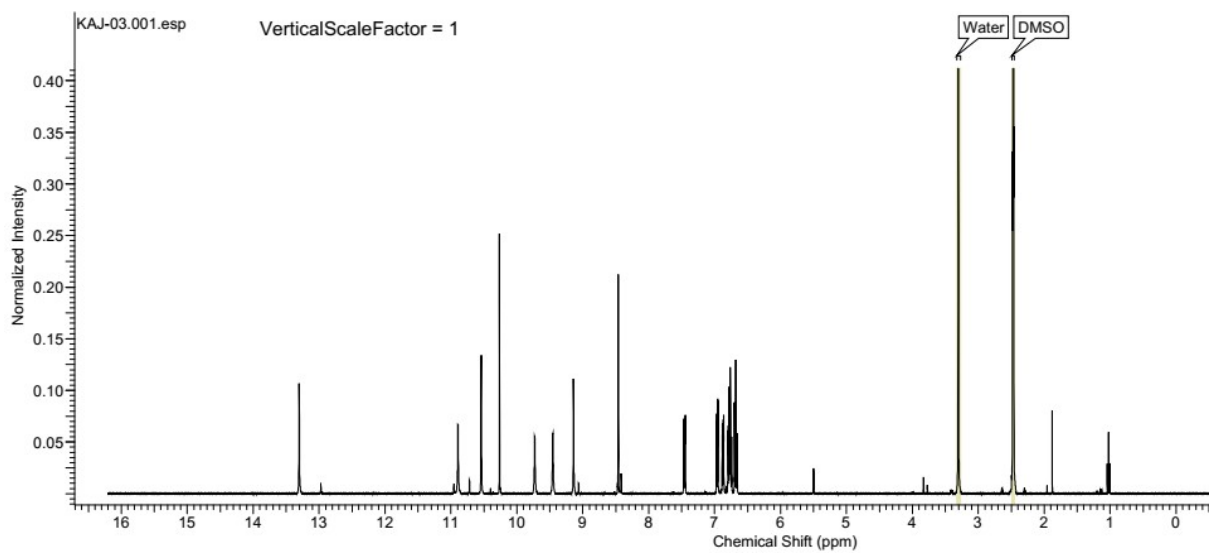

**Figure-S19. <sup>1</sup>H NMR Spectra of Compound-3**

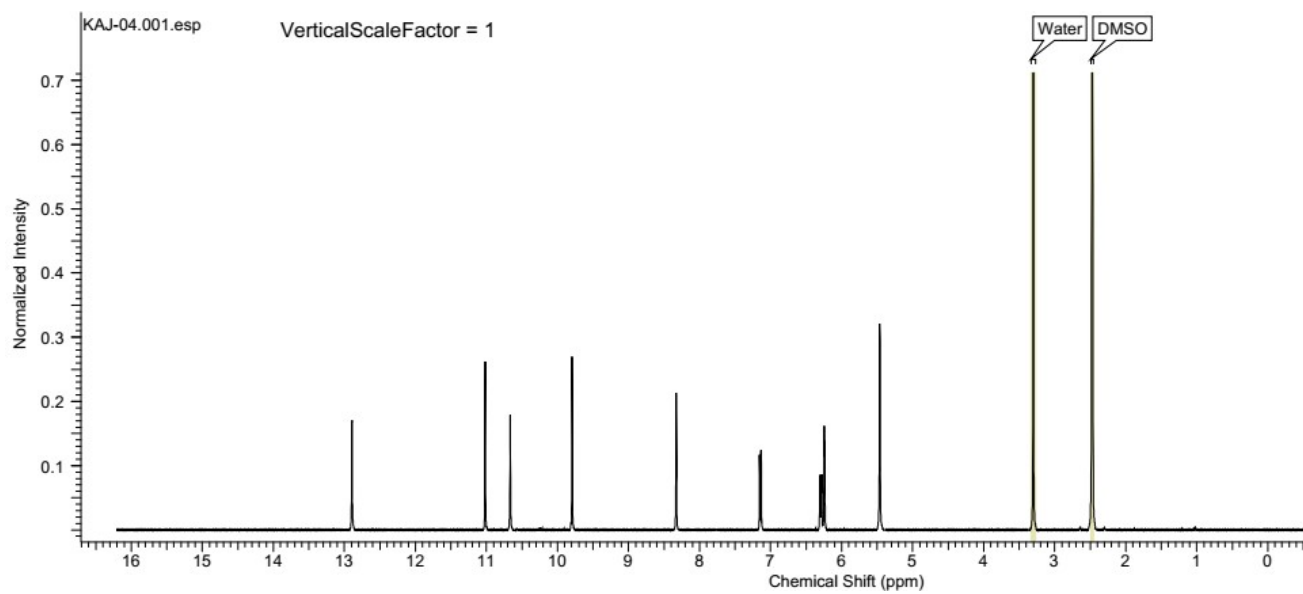

**Figure-S20. <sup>1</sup>H NMR Spectra of Compound-4**



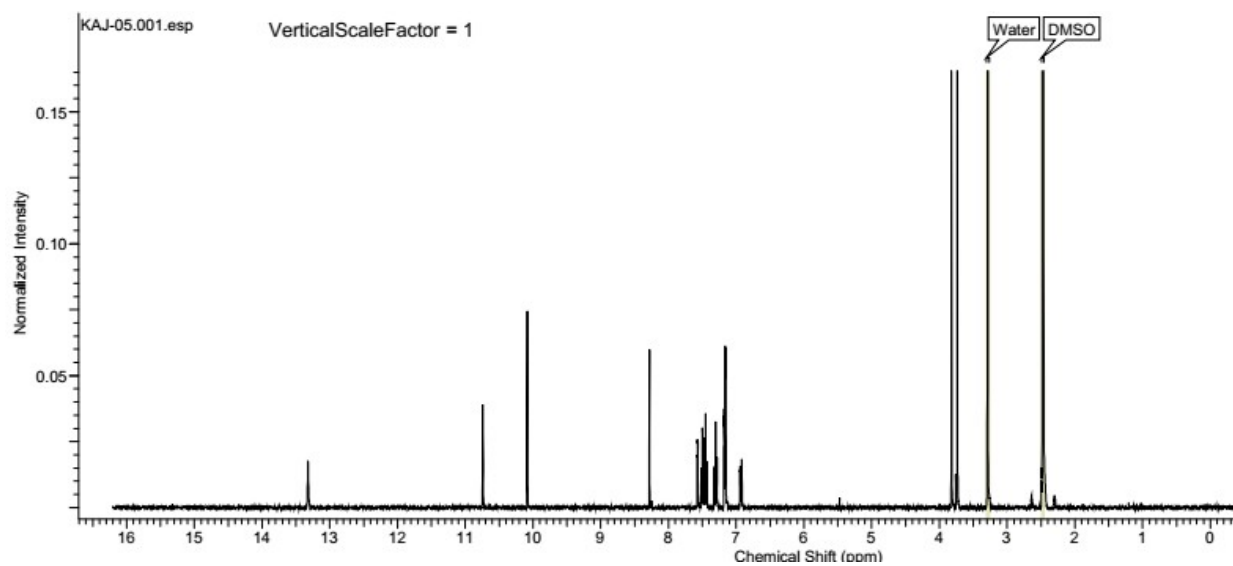

Figure-S21. <sup>1</sup>H NMR Spectra of Compound-5

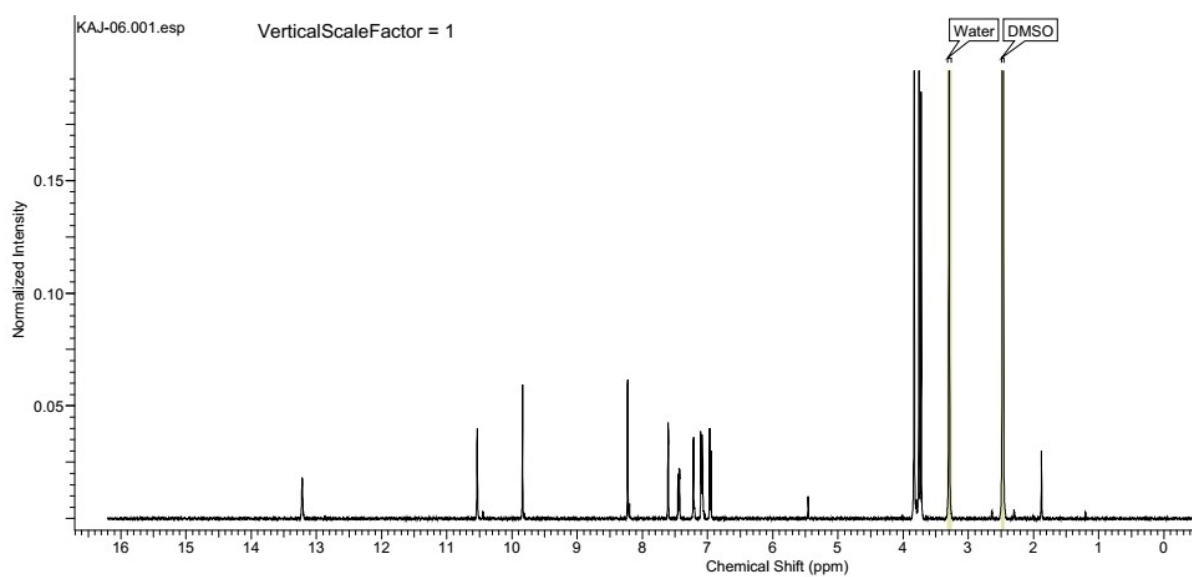

Figure-S22. <sup>1</sup>H NMR Spectra of Compound-6

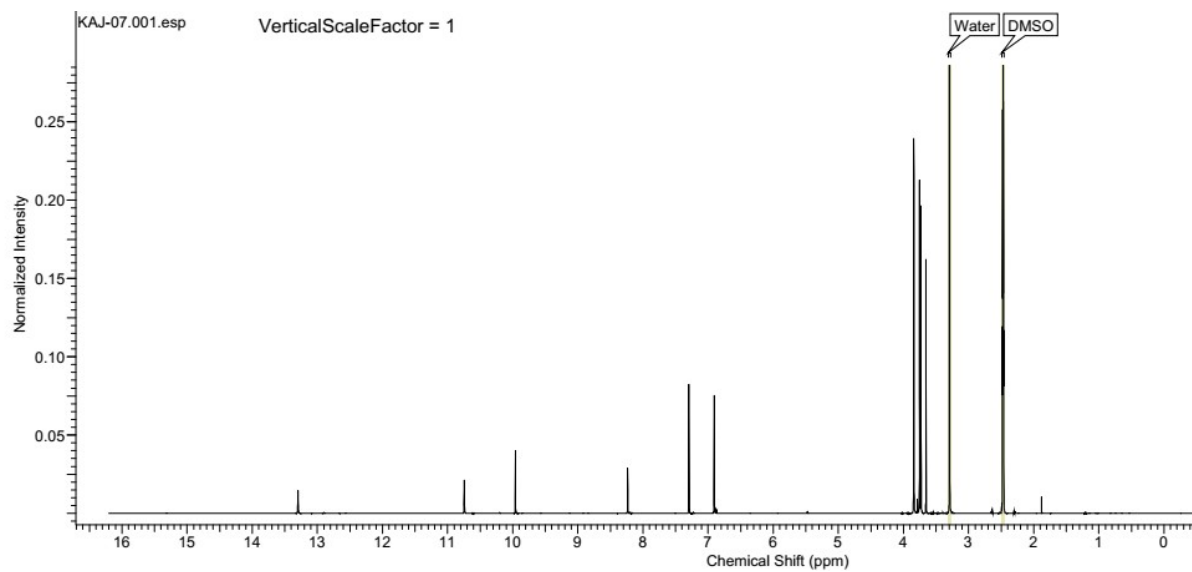

**Figure-S23.  $H^1$  NMR Spectra of Compound-7**

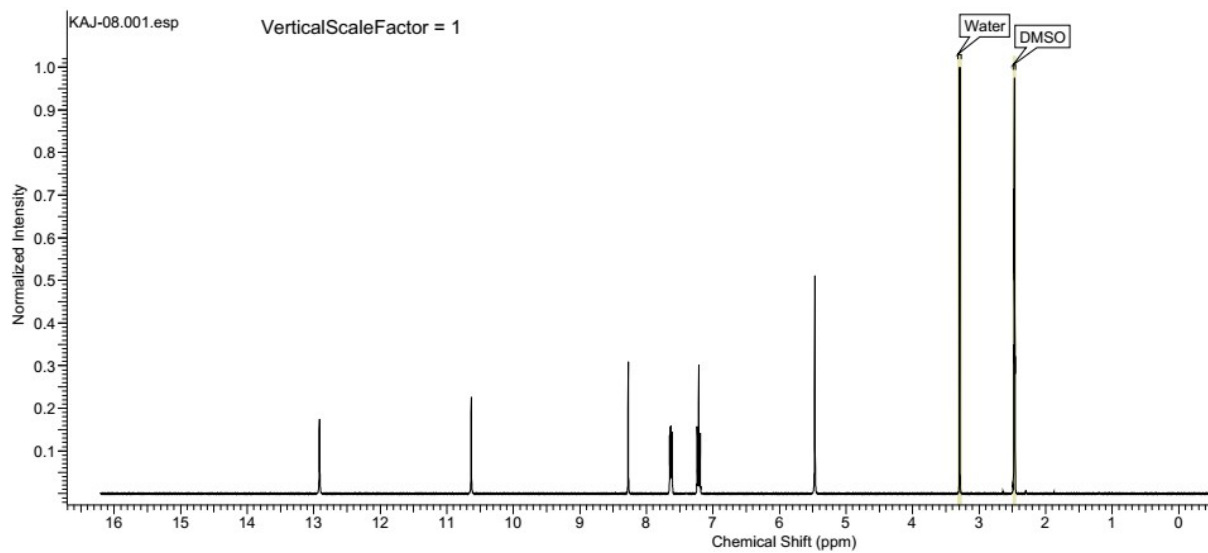

**Figure-S24.  $H^1$  NMR Spectra of Compound-8**

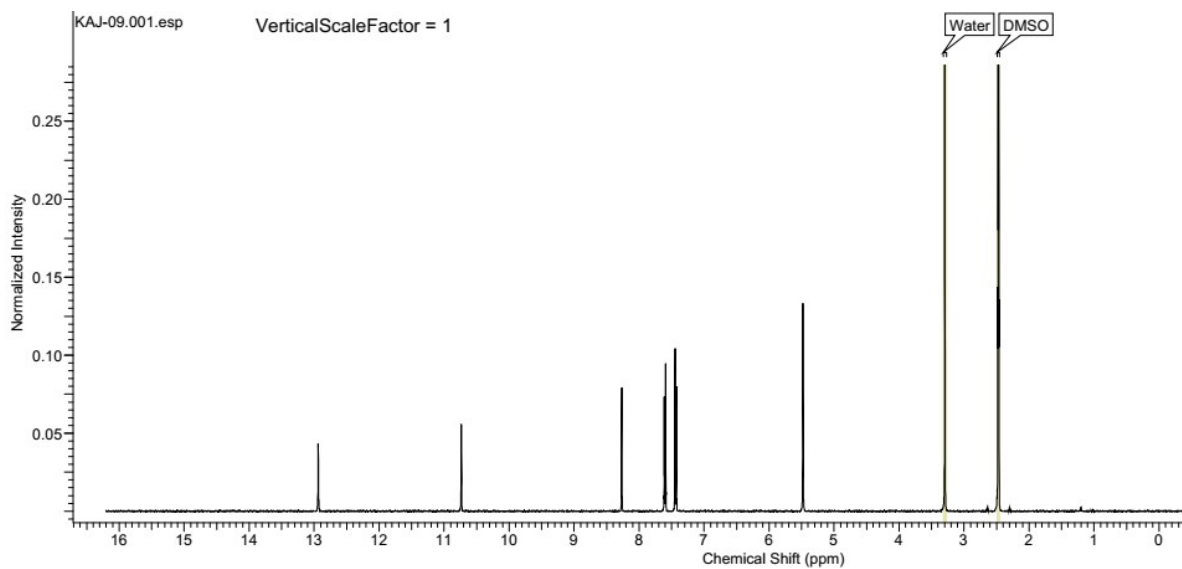

**Figure-S25. <sup>1</sup>H NMR Spectra of Compound-9**

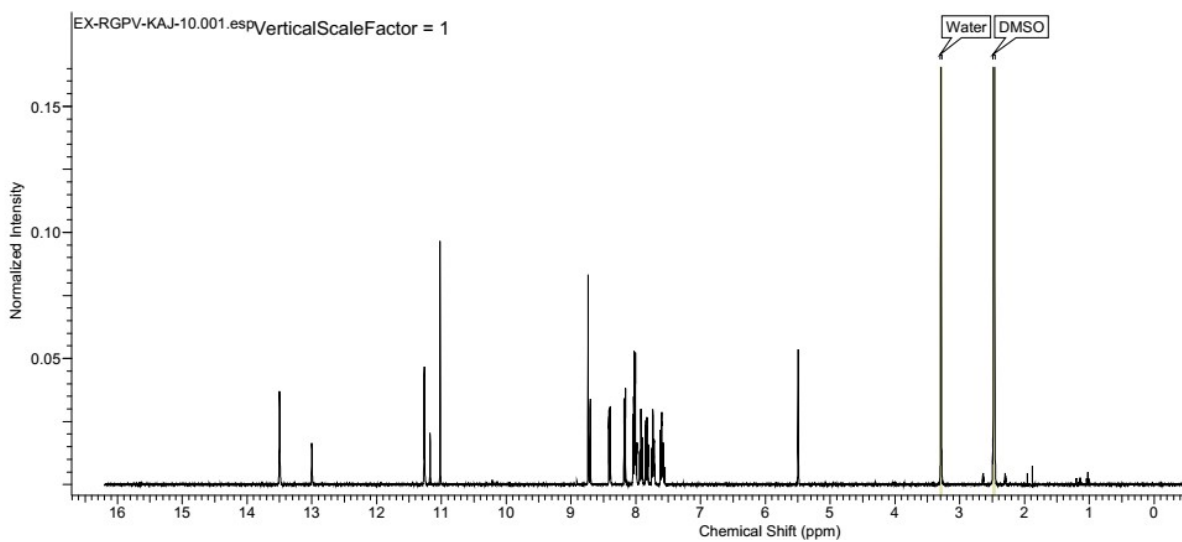

**Figure-S26. <sup>1</sup>H NMR Spectra of Compound-10**

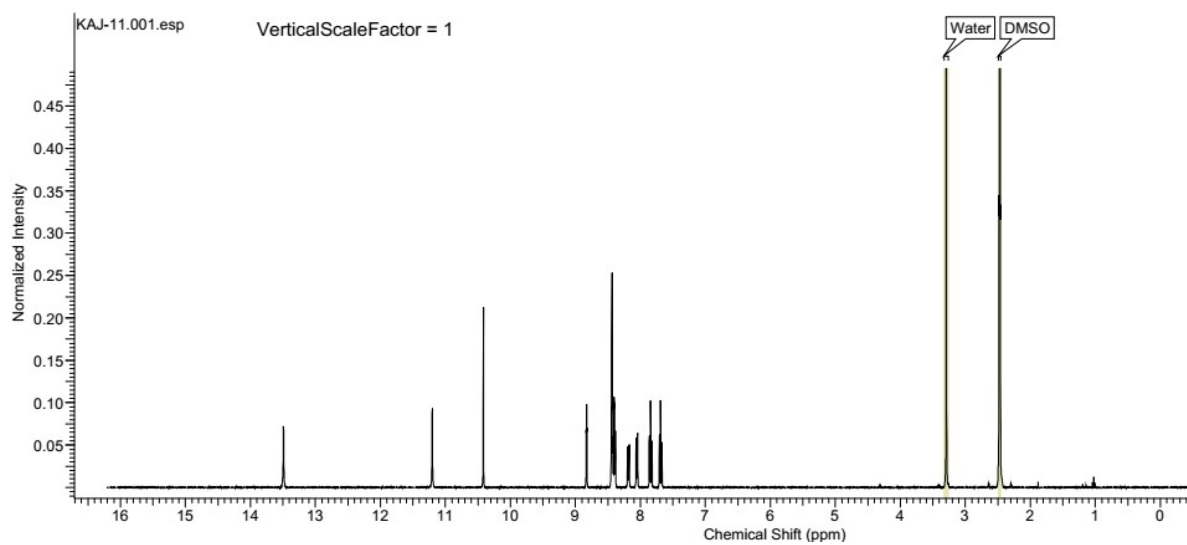

**Figure-S27.  $H^1$  NMR Spectra of Compound-11**

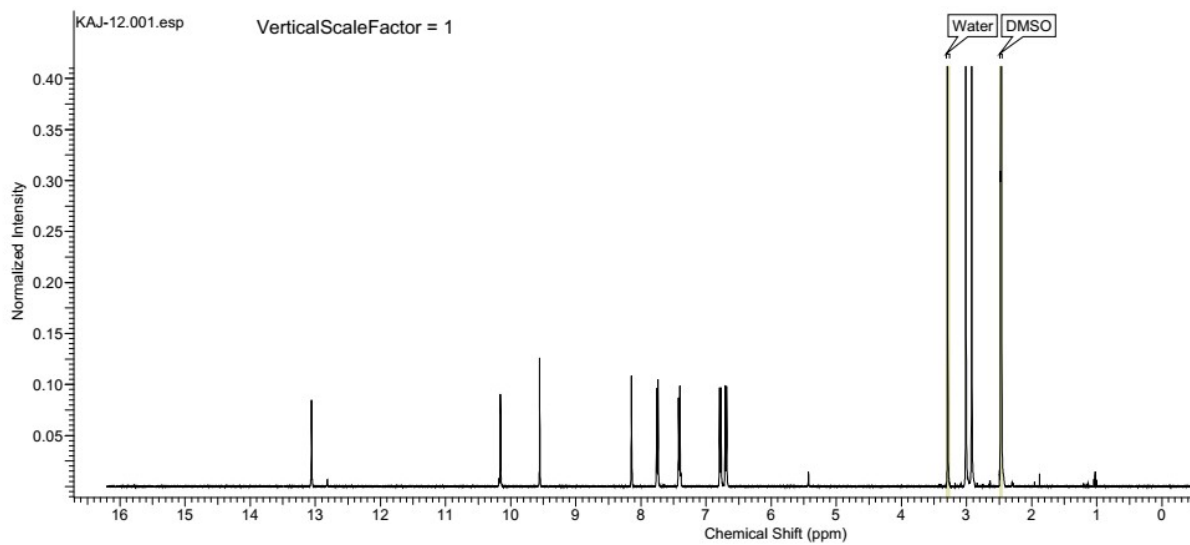

**Figure-S28.  $H^1$  NMR Spectra of Compound-12**

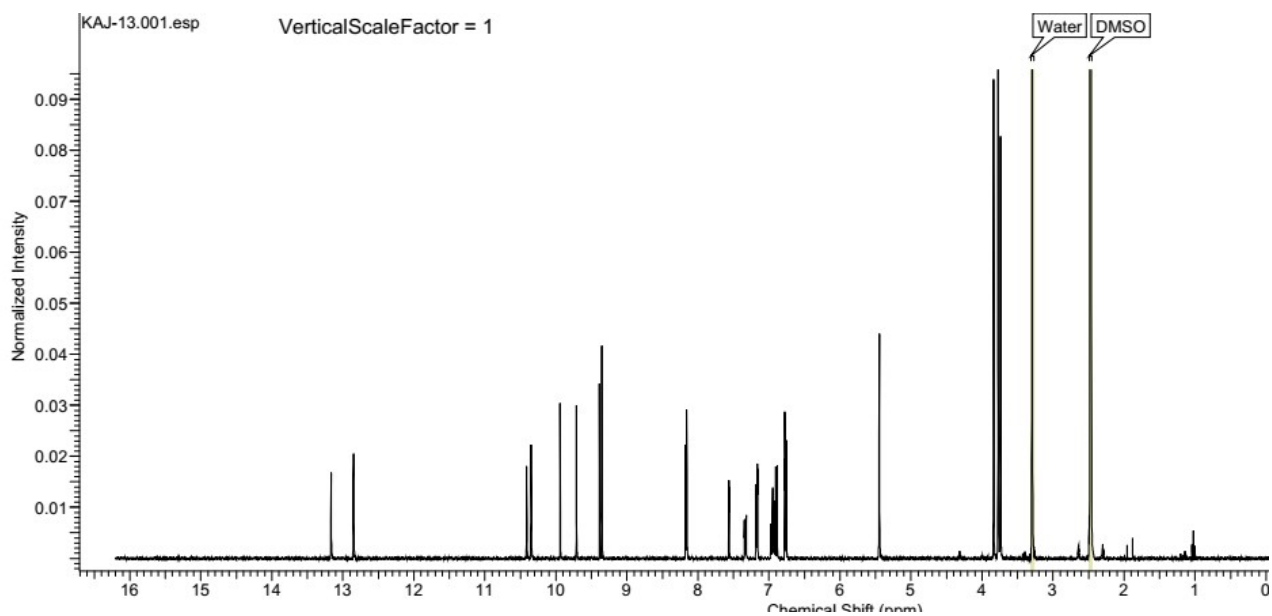

**Figure-S29. <sup>1</sup>H NMR Spectra of Compound-13**

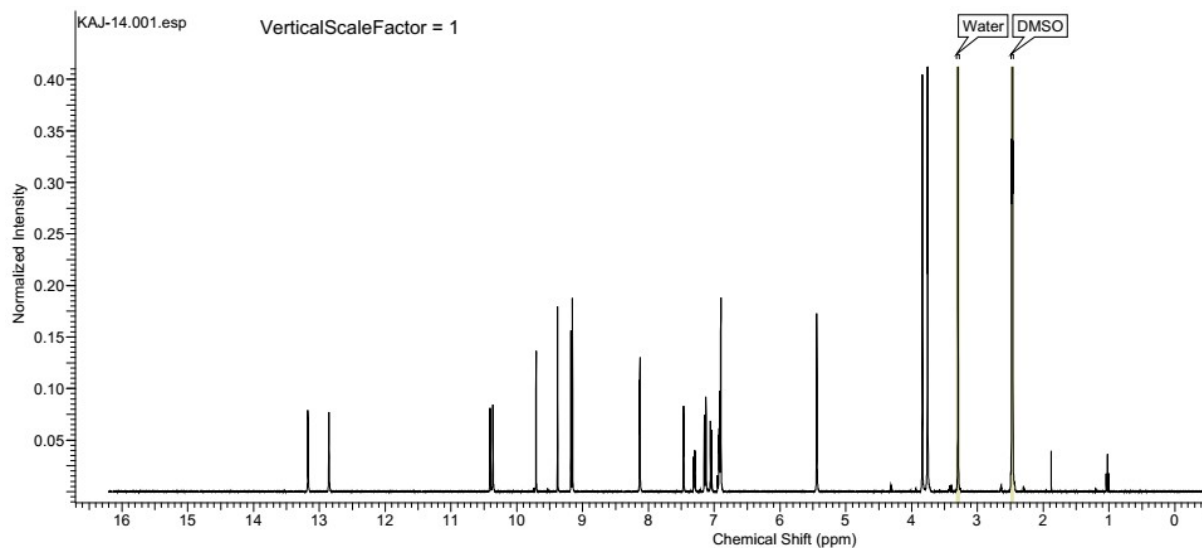

**Figure-S30. <sup>1</sup>H NMR Spectra of Compound-14**

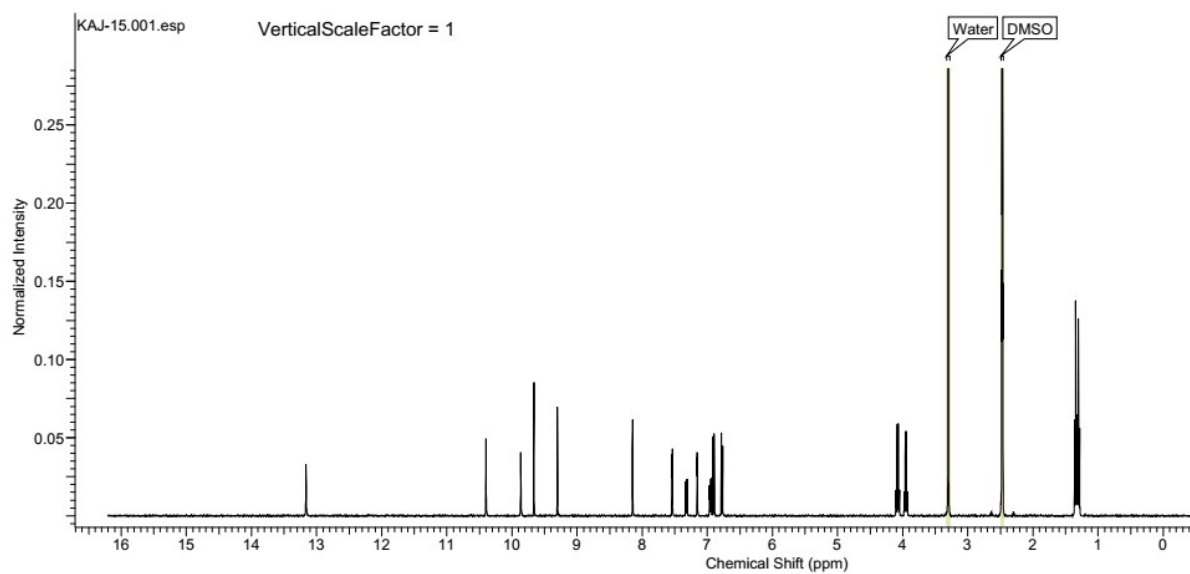

**Figure-S31.  $H^1$  NMR Spectra of Compound-15**

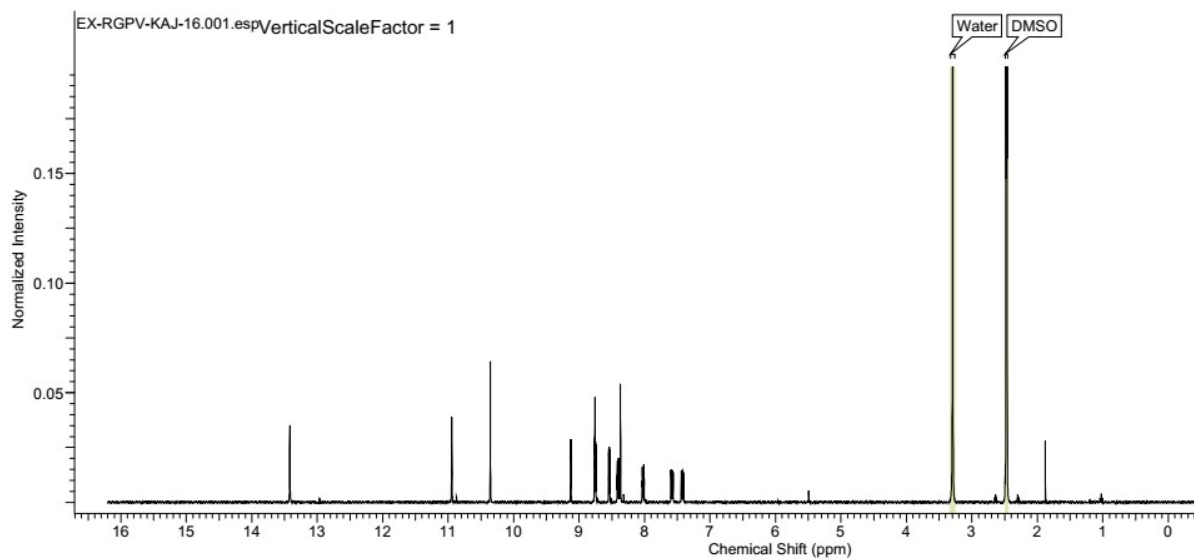

**Figure-S32.  $H^1$  NMR Spectra of Compound-16**

**Table-S1 : Kinase Inhibition Assay for-DYRK1A (IC<sub>50</sub>-Values)**

| Conc. (μM)   | Conc. (nM) | LOG Conc.             | % Activity of Compd-3 (Mean) | <u>S</u><br><u>D</u> | % Activity of Compd-4 (Mean) | <u>SD</u> | % Activity of Compd-5 (Mean) | <u>SD</u> |
|--------------|------------|-----------------------|------------------------------|----------------------|------------------------------|-----------|------------------------------|-----------|
| <b>0.003</b> | 3          | 0.477121              | 95                           | 6                    | 101                          | 5         | 94                           | 4         |
| <b>0.01</b>  | 10         | 1.000000              | 101                          | 12                   | 98                           | 1         | 105                          | 7         |
| <b>0.017</b> | 17         | 1.230449              | 95                           | 23                   | 97                           | 6         | 101                          | 5         |
| <b>0.024</b> | 24         | 1.380211              | 115                          | 11                   | 87                           | 6         | 99                           | 7         |
| <b>0.031</b> | 31         | 1.491362              | 105                          | 15                   | 90                           | 6         | 104                          | 5         |
| <b>0.038</b> | 38         | 1.579784              | 79                           | 10                   | 66                           | 3         | 88                           | 3         |
| <b>0.045</b> | 45         | 1.653213              | 44                           | 4                    | 50                           | 6         | 99                           | 3         |
| <b>0.052</b> | 52         | 1.716003              | 16                           | 3                    | 16                           | 0         | 75                           | 6         |
| <b>0.059</b> | 59         | 1.770852              | 6                            | 1                    | 9                            | 1         | 72                           | 4         |
| <b>0.066</b> | 66         | 1.819544              | 2                            | 0                    | 12                           | 0         | 58                           | 4         |
|              |            | IC <sub>50</sub> (nM) | 2868                         |                      | 2240                         |           | >100000                      |           |
|              |            | IC <sub>50</sub> (uM) | 2.87 μM                      |                      | 2.24 μM                      |           | >100                         |           |
|              |            |                       |                              |                      |                              |           |                              |           |

**Table-S2 Kinase Inhibition Assay for-CLK-1 (IC<sub>50</sub>-Values)**

| Conc. (μM)   | Conc. (nM) | LOG Conc.             | % Activity of Compd-3 (Mean) | <u>S</u><br><u>D</u> | % Activity of Compd-4 (Mean) | <u>SD</u> | % Activity of Compd-5 (Mean) | <u>SD</u> |
|--------------|------------|-----------------------|------------------------------|----------------------|------------------------------|-----------|------------------------------|-----------|
| <b>0.003</b> | 3          | 0.477121              | 97                           | 16                   | 88                           | 26        | 110                          | 13        |
| <b>0.01</b>  | 10         | 1.000000              | 119                          | 10                   | 106                          | 2         | 117                          | 7         |
| <b>0.03</b>  | 30         | 1.477121              | 105                          | 13                   | 106                          | 2         | 100                          | 16        |
| <b>0.1</b>   | 100        | 2.000000              | 111                          | 3                    | 104                          | 9         | 105                          | 6         |
| <b>0.3</b>   | 300        | 2.477121              | 107                          | 1                    | 84                           | 3         | 79                           | 11        |
| <b>1</b>     | 1000       | 3.000000              | 55                           | 11                   | 72                           | 10        | 50                           | 1         |
| <b>3</b>     | 3000       | 3.477121              | 35                           | 2                    | 51                           | 14        | 32                           | 4         |
| <b>10</b>    | 10000      | 4.000000              | 17                           | 0                    | 17                           | 1         | 18                           | 3         |
| <b>30</b>    | 30000      | 4.477121              | 7                            | 0                    | 8                            | 1         | 19                           | 2         |
| <b>100</b>   | 100000     | 5.000000              | 3                            | 0                    | 5                            | 1         | 17                           | 2         |
|              |            | IC <sub>50</sub> (nM) | 1376                         |                      | 2575                         |           | 974.9                        |           |
|              |            | IC <sub>50</sub> (uM) | 1.38μM                       |                      | 2.58 μM                      |           | 0.97 μM                      |           |
|              |            |                       |                              |                      |                              |           |                              |           |
